# 1 **Anaerobic metabolism of Foraminifera thriving below the seafloor**

2

3 **Authors:** William D. Orsi<sup>1,2\*</sup>, Raphaël Morard<sup>4</sup>, Aurele Vuillemin<sup>1</sup>, Michael Eitel<sup>1</sup>, Gert Wörheide<sup>1,2,3</sup>,

4

Jana Milucka<sup>5</sup>, Michal Kucera<sup>4</sup>

## 5 **Affiliations:**

6 1. Department of Earth and Environmental Sciences, Paleontology & Geobiology, Ludwig-Maximilians-  
7 Universität München, 80333 Munich, Germany.

8 2. GeoBio-Center<sup>LMU</sup>, Ludwig-Maximilians-Universität München, 80333 Munich, Germany

9 3. SNSB - Bayerische Staatssammlung für Paläontologie und Geologie, 80333 Munich, Germany

10 4. MARUM – Center for Marine Environmental Sciences, University of Bremen, Germany

11 5. Department of Biogeochemistry, Max Planck Institute for Marine Microbiology, Bremen, Germany

12

13 \*To whom correspondence should be addressed: [w.orsi@lrz.uni-muenchen.de](mailto:w.orsi@lrz.uni-muenchen.de)

14

15 **Abstract:** Foraminifera are single-celled eukaryotes (protists) of large ecological importance, as well as  
16 environmental and paleoenvironmental indicators and biostratigraphic tools. In addition, they are capable  
17 of surviving in anoxic marine environments where they represent a major component of the benthic  
18 community. However, the cellular adaptations of Foraminifera to the anoxic environment remain poorly  
19 constrained. We sampled an oxic-anoxic transition zone in marine sediments from the Namibian shelf,  
20 where the genera *Bolivina* and *Stainforthia* dominated the Foraminifera community, and use  
21 metatranscriptomics to characterize Foraminifera metabolism across the different geochemical  
22 conditions. The relative abundance of Foraminifera gene expression in anoxic sediment depths increased  
23 an order of magnitude, which was confirmed in a ten-day incubation experiment where the development of  
24 anoxia coincided with a 27-fold increase in the relative abundance of Foraminifera protein encoding  
25 transcripts. This indicates that many Foraminifera were not only surviving, but thriving under the anoxic  
26 conditions. The anaerobic energy metabolism of these active Foraminifera was characterized by  
27 fermentation of sugars and amino acids, dissimilatory nitrate reduction, fumarate reduction, and  
28 dephosphorylation of creatine phosphate. This was co-expressed alongside genes involved in production of  
29 reticulopodia, phagocytosis, calcification, and clathrin-mediated-endocytosis (CME). Thus, Foraminifera  
30 may use CME under anoxic conditions to utilize dissolved organic matter as a carbon and energy source,  
31 in addition to ingestion of prey cells via phagocytosis. These mechanisms help explain how some  
32 Foraminifera can thrive under anoxia, which would help to explain their ecological success documented in  
33 the fossil record since the Cambrian period more than 500 million years ago.

34

35

36 **Introduction:** Foraminifera are one of the most ubiquitous free-living marine eukaryotes on Earth and  
37 have been documented in the fossil record since the Cambrian period (1), surviving all mass extinction  
38 events involving extensive ocean anoxia (2). Benthic foraminifera inhabit marine sediments (3), where  
39 they can represent up to 50% of the sediment biomass in shallow depths of the seabed (4) and play a  
40 significant role in the benthic carbon and nitrogen cycles (5). Foraminifera are known to be resistant to  
41 oxygen depletion and may persist in the benthic community even under the development of anoxic and  
42 sulfidic conditions (6-8). A key to their survival in the absence of oxygen is their ability to perform  
43 complete denitrification (9), which appears to be a shared trait among many clades that likely evolved  
44 early in the evolutionary history of the group (10). A better understanding of anaerobic metabolism in  
45 Foraminifera under anoxic conditions could illuminate their ecological role in the benthos (11) and  
46 explain the ecological success of Foraminifera throughout the Phanerozoic, across multiple mass  
47 extinction events and associated widespread ocean anoxia (2).

48 To this end, we applied metatranscriptomics to study the active gene expression of anaerobic  
49 benthic Foraminifera in anoxic Namibian shelf sediments, and reconstruct their active biochemical  
50 pathways in situ. Our transcriptomic analysis showed the anaerobic pathways of ATP production, and  
51 revealed the biosynthetic processes that consume ATP. Our data indicate that Foraminifera are not only  
52 surviving under anoxic conditions, but that their activity is stimulated by anoxia. Analysis further shows  
53 the anaerobic mechanisms of ATP production which benthic Foraminifera employ to produce sufficient  
54 energy to power a multitude of energetically expensive cellular processes in the absence of oxygen.  
55 Transcriptional activity could be stimulated by the development of anoxic conditions during a ten day  
56 incubation indicating that many benthic Foraminifera are not only surviving, but appear to thrive under  
57 anoxic conditions.

58

59 **Results:** A total of 14 sediment depth horizons were analyzed from a 28 cm long sediment core  
60 sectioned every 2 cm, which was retrieved from 125 m water depth on the continental shelf off Namibia  
61 (12). The core was sampled (sliced) immediately and stored at -20 C within 30 minutes after collection  
62 for metatranscriptomics and quantitative community composition estimates via microscopy. The pore  
63 water chemical analysis indicated that nitrate and nitrite were consumed quickly at the sediment surface  
64 followed by an increased accumulation of ammonium and sulfide with depth (Fig 1). Intact Foraminifera  
65 cells containing cytoplasm observed with light microscopy decreased in abundance with increasing depth,  
66 but were still present in the deepest part of the core indicating that these Foraminifera cells were living  
67 under anoxic conditions (Fig. 1). However, burrowing polychaete worms were observed throughout the  
68 core indicating the potential for downward vertical transport of oxidized porewater (e.g., containing O<sub>2</sub>,

69 NO<sub>3</sub><sup>-</sup>) via bioirrigation processes. Throughout the entire core sequence, 95% of the Foraminifera  
70 community at all depths was represented by the genera *Bolivina* and *Stainforthia*. We observed a bimodal  
71 distribution of the foraminifera absolute abundance with the maximum density at the oxic-anoxic  
72 transition at the surface layer of with ~ 260 benthic foraminifera individuals per gram of sediment,  
73 followed by a steep decrease until 12-14 centimeters below sea floor (cmbsf) with 30 individuals per  
74 gram of sediment followed by an increase to 80 individuals per gram of sediment at 20-22 cmbsf,  
75 coinciding with nitrate-sulfide transition zone (Fig 1).

76 Metatranscriptomes were sequenced to a depth of on average 6 (+/- 5) million reads per sample  
77 (Table S1). Analyses of the metatranscriptomes showed that the Foraminifera increased their gene  
78 expression significantly under anoxic conditions, and they exhibited levels of gene expression far greater  
79 than all other groups of protists identified in the transcriptomes (Fig 2). The absolute level of gene  
80 expression by the Foraminifera increased with depth, because the total number of unique expressed  
81 protein encoding open reading frames (ORFs) assigned to Foraminifera increased (Fig 2b). An higher  
82 number of absolute unique ORFs expressed by Foraminifera cannot be explained by a reduction in gene  
83 expression from other groups. Clearly, some of the Foraminifera that were observed with intact cytoplasm  
84 in the deeper part of the core (Fig 1) increase their gene expression under anoxic conditions (Fig 2b, c).

85 Phylogenetic analyses of two Foraminifera 18S rDNA sequences recovered from the  
86 metatranscriptomes had closest affiliation to previously reported *Stainforthia* and *Bolivina* 18S rDNA  
87 sequences, also recovered from anoxic Namibian sediments (Fig. 3). *Stainforthia* and *Bolivina* tests  
88 containing cytoplasm were also observed in the core, their relative abundance gradually increased with  
89 depth, and *Bolivina* was the most abundant genus observed (Fig 1). Successful detection of its expressed  
90 18S rRNA confirms that our metatranscriptomic approach captured the activity of this numerically  
91 dominant group. This is also reflected by the read mapping statistics (Figure S2), which support the ratios  
92 observed based on counts of cytoplasm containing tests with the *Bolivina* sp. 18S rRNA fragment showing  
93 a maximum read coverage of 312x and an average coverage of 125x. In contrast, the 18S rRNA from the  
94 comparatively less abundant cytoplasm containing tests from *Stainforthia* sp. (Fig 1) had lower maximum  
95 and mean coverages 135x and 34x, respectively. In contrast to 18S rRNA sequences, metatranscriptomic  
96 ORFs had the highest similarity to previously sequenced genomes and transcriptomes of *Ammonia*,  
97 *Elphidium*, *Rosalina*, and *Globobulimina* cells (Fig S1), the very few previously sequenced transcriptomes  
98 derived from Foraminifera (10, 13, 14). We could not find publicly available genome or transcriptome data  
99 from *Stainforthia* or *Bolivina* to include in our database for annotating the metatranscriptome data. Thus  
100 given that we could only detect 18S rRNA from *Stainforthia* and *Bolivina* (Fig 3) in the metatranscriptomes  
101 (and none from *Ammonia*, *Elphidium*, *Rosalina*, and *Globobulimina*), we assume that most of the ORFs  
102 with highest similarity to Foraminifera are likely derived from the numerically dominant *Stainforthia*

103 and *Bolivina* cells observed in the core (Fig 1), but have top hits to other Foraminifera (e.g., *Ammonia*,  
104 *Elphidium*, *Rosalina*, and *Globobulimina*: Fig S1) since *Stainforthia* and *Bolivina* transcriptomes are  
105 missing in our database. We then proceeded to analyze these Foraminifera-derived ORFs in the  
106 metatranscriptomes to gain insights into possibly anaerobic biochemical pathways and physiologies, after  
107 annotating all of the Foraminifera-derived ORFs against the clusters of Eukaryotic Orthologous Genes  
108 (KOGs) database (15).

109 Expression of foraminiferal KOGs showed that at all depths the transcriptional activity was  
110 dominated by genes involved in cell cycle and cell signaling processes, namely cell cycle control, signal  
111 transduction, intracellular trafficking, cytoskeleton, and posttranslational modification (Fig 2). The  
112 expression of genes involved in translation and biogenesis was detected only in the deepest, anoxic sample  
113 indicating an increase in growth and biosynthesis in Foraminifera cells. There was also a general trend of  
114 decreasing energy production and conversion (COG category C) with depth, together with an increasing  
115 expression of genes involved in signal transduction under anoxic conditions (Fig 2). The gene expression  
116 from Foraminifera was significantly different between the anoxic depth at 28 cmbsf, and the other shallower  
117 depths (Fig 4a: ANOSIM,  $P < 0.01$ ).

118 The Foraminifera gene expression data indicate four possible anaerobic mechanisms of ATP  
119 production in benthic Foraminifera: [1] substrate level phosphorylation (SLP) of sugars and amino acids  
120 via glycolysis and fermentation, [2] dephosphorylation of creatine phosphate via creatine kinase, [3] use of  
121 fumarate as a terminal electron acceptor via fumarate-NADH reductase, and [4] dissimilatory reduction of  
122 nitrite to generate proton gradient at the membrane for generation of ATP via ATP synthase (Fig 4c). A  
123 partial foraminiferal denitrification pathway (10) was expressed including a putative dissimilatory nitrate  
124 reductase (Nr), dissimilatory nitrite reductase (16), and nitric oxide reductase (Nos) (Fig 4a). Additionally,  
125 genes encoding foraminiferal nitrate transporters (10) (Nrt) were expressed indicating active  
126 transmembrane nitrate transport (Fig 4). No homologs to NarK type nitrate/nitrite anitporters that common  
127 in denitrifying bacteria (17), were detected in the Formainifera transcriptomes. Apparently, these anaerobic  
128 energy production mechanisms produce sufficient ATP in the Foraminifera cells to fuel energetically costly  
129 biosynthesis pathways including production of reticulopodia, phagocytosis, and clathrin mediated  
130 endocytosis (Fig. 4).

131 The anaerobic energy production mechanisms also produce sufficient ATP in the Foraminifera cells  
132 to fuel biomineralization (Fig 4). Of note are the expression of Foraminifera ORFs encoding F-actin  
133 proteins, that have been shown experimentally to be involved in the biomineralization of the calcium  
134 carbonate test (18). Foraminiferal genes encoding ORFs with similarity to protein diaphanous homolog 1  
135 (DIAPH1) were also expressed (Fig 4a), which respond to environmental stimuli and are responsible for  
136 actin nucleation and elongation factor required for the assembly of F-actin structures (19). Since F-actin is

137 required for biomineralization and calcification of the Foraminifera test (18), the expression of DIAPH1 is  
138 indicative of ongoing calcification in Foraminifera under anoxic conditions. This is consistent with prior  
139 experimental evidence that Foraminifera can calcify under anoxia (20).

140 Foraminiferal genes encoding Rho proteins were expressed, that are responsible for the induction  
141 of phagocytosis (21, 22). Furthermore, Foraminiferal vacuolar-type H<sup>+</sup> ATPases were expressed (Fig 4),  
142 which are responsible for lysing digested prey cells inside food vacuoles after phagocytosis (23) (Fig  
143 4). Foraminifera ORFs were also expressed that encoded microtubules, kinesin, and dynein, the latter two  
144 which are responsible for sending and receiving cellular cargo to and from the membrane, respectively (Fig  
145 4). The expression of ORFs encoding “unconventional” (non muscle) myosin I, II, and VII (Fig 4) from  
146 Foraminifera further indicate active phagocytosis. These nonmuscle myosins accumulate at the  
147 “phagocytic synapse” (Fig 4b), the point of contact between the pseudopodia and prey cell, which suggests  
148 a role for contractile motors proteins during particle internalization (24). Pseudopod extension and  
149 engulfment has been shown experimentally to be mediated by myosin II that is recruited to the phagocytic  
150 synapse (25). However, in addition to phagocytosis, myosin motor proteins play an important part in  
151 several cytoskeletal processes involving movement such as cell adhesion, cell migration and cell division  
152 (26). Thus, it is likely that myosins expressed by the Foraminifera under anoxic conditions play a role in a  
153 wide range of cellular processes that require force and translocation, for example their motility through the  
154 sediment matrix as they search for prey. Clathrin-encoding genes from Foraminifera were also expressed  
155 in two samples (at 28 cmbsf) that are involved involved in clathrin-mediated-endocytosis (CME), an  
156 additional form of endocytosis and involves an invagination of the membrane via clathrin proteins  
157 (23). CME results in much smaller vesicles (30-200 nm) compared to those obtained from phagocytosis  
158 (500 – 9,000 nm) (23) and are used to ingest signaling molecules and other forms of dissolved organic  
159 matter. Collectively, these data highlight the key cellular processes needed for survival under anoxia in  
160 benthic Foraminifera.

161 A 10-day incubation of sediment collected from the seafloor, showed that benthic Foraminifera  
162 increased their gene expression 27 (+/- 9) fold after the development of anoxic conditions within 20 hrs  
163 (Fig. 5). This dramatic increase was observed after oxygen consumption declined steadily over the first 20  
164 hours of the incubation, which was consistent between all biological replicates (Fig. 5). After the  
165 development of anoxic conditions, Foraminifera gene expression decreased progressively but still remained  
166 10 to 20 times higher than the  $t_0$  values up for at least 6 days (Fig 5). After 10 days, the gene expression  
167 levels decreased further down to 0.36% (+/- 0.07) of total transcripts, but this was still elevated 2-fold  
168 relative to the  $t_0$  values.

169

170 **Discussion:**

171 On the Namibian shelf, Foraminifera live deep below the seafloor down to ca. 30 cmbsf (27), co-  
172 existing with sulfate reducing bacteria in an anoxic environment that is extremely high in sulfide (28). The  
173 steadily decreasing abundance of Foraminifera cells in the core with anoxic conditions (Fig 1) is consistent  
174 with the reduced rate of heterotrophic metabolism in Foraminifera under anoxic conditions (29), and lower  
175 levels of ATP in many Foraminifera under anoxia (11). The dominance of *Bolivina* throughout the core  
176 and our detection of their 18S rRNA, even into the anoxic depths, is consistent with the known affinity of  
177 *Bolivina* for oxygen-depleted habitats (30), including the studied region as it was observed previously in  
178 multiple coring locations on the Namibian shelf (27). The “trophic oxygen model” developed by Jorissen  
179 et al (31) predicts that the dynamic nature of microhabitats allows Foraminifera to migrate up and down in  
180 the sediment with the prevailing redox conditions, which is controlled by the organic matter flux (32,  
181 33). Hence, since we sampled during the southern Winter when bottom water oxygen levels in the  
182 Namibian OMZ are higher (34, 35), it is possible that the penetration depth of the Foraminifera extends  
183 relatively deep because of the higher oxygen concentration at the sediment surface.

184 Although the diversity of Foraminifera is well constrained by morphological studies, the group is  
185 not yet well represented in transcriptomic and genomic databases. The recently large transcriptome  
186 sequencing effort of microbial eukaryotes helped to alleviate this problem (14), since it included several  
187 Foraminifera that we could add to our database. Nevertheless, because of the relatively low number of  
188 sequenced genomes and transcriptomes from Foraminifera (compared to bacteria for example), our  
189 metatranscriptome approach cannot distinguish between ORFs derived from different Foraminifera  
190 species. The ORFs assigned to Foraminifera here thus serves as a “group averaging”, but should correspond  
191 to genetically similar populations since the *de novo* assemblies that are used to build the contigs from the  
192 RNAseq data are based on genetic similarity (see Methods). Furthermore, our metatranscriptomes  
193 contained the complete 18S rRNA sequence (Fig. 3) from the most abundant taxa, i.e., *Bolivina* sp. and  
194 *Stainforthia* sp. (Fig S2) and thus we are confident that the ORFs assigned as Foraminifera are derived  
195 primarily from these cytoplasm-containing Foraminifera tests that we could enumerate in the core (Fig.  
196 1). It is further worth mentioning that despite the presence of two morphological different *Bolivina* species  
197 in the core, we could not find signs for the active expression of the 18S rDNA in the second species. This  
198 indicates that most of the identified foraminiferan metatranscriptomic expression likely comes from one of  
199 the *Bolivina* species in addition to *Stainforthia* sp. These findings implies that one foraminiferan species  
200 can be active under anoxic conditions while a congeneric species might not be (as) active.

201 Foraminifera are predators, and are thought to act primarily as heterotrophs utilizing ingested prey  
202 cells as carbon sources for growth (36). Our gene expression analysis provides insights into the  
203 mechanisms of prey acquisition, and the metabolic processing of the ingested material. The expression of  
204 ORFs encoding Rho proteins by Foraminifera indicate an active induction of phagocytosis, since Rho

205 proteins function in actin dynamics during phagocytosis (21, 22). Myosin motor proteins are recruited to  
206 the cell membrane during phagocytosis in order to envelope and capture prey particles (37), and the prey  
207 then enter the phagocytosing cell as a food vacuole (23). Food vacuoles are then transported in to the cell  
208 via dynein along microtubules, where the contents are digested under acidic conditions via the activity of  
209 vacuolar-type H<sup>+</sup> ATPases (23) (Fig. 4). Such proton pumping ATPases are responsible for lysing digested  
210 prey cells inside food vacuoles after phagocytosis, where the acidified lysosomal vesicles are loaded with  
211 digestive enzymes (23). The metatranscriptome data indicate that under anoxic conditions, the  
212 Foraminifera metabolize the hydrolyzed organics for ATP production via fermentation and fumarate  
213 reduction, and dissimilatory nitrite reduction (Fig. 4). Because cells are mostly protein, anaerobic  
214 fermentation of ingested prey cells by Foraminifera may include amino acid fermentations. By weight,  
215 exponentially growing cells are made of roughly 50-60% protein, 20% RNA, 10% lipids, 3% DNA, 10-  
216 20% sugars as cell wall constituents, and some metabolites (38-40). Amino acid fermentations provide  
217 roughly one net ATP per amino acid fermented (23).

218 In addition to hydrolyzed organics from ingested prey, the transcriptomes suggest that CME is  
219 another mechanism by which Foraminifera could utilize both high- and low-molecular weight dissolved  
220 organic matter (dissolved in the pore water of the sediments) under anoxic conditions. Experiments using  
221 <sup>13</sup>C-labeled diatom prey showed that under anoxic conditions the benthic foram *Ammonia tepida* reduced  
222 the number of phagocytosed diatom cells, and the ingested cells were apparently not digested inside  
223 vacuoles but remained intact after 4 weeks (29). If a decreased utilization of ingested prey for energy  
224 production is a general feature of anaerobic Foraminifera, it is possible that organic matter obtained via  
225 CME (Fig. 4b, c) becomes a relatively more important carbon source as opposed to ingested prey cells.

226 Eukaryotic fermentations can produce a variety of end products, and our data indicate the  
227 possibility for Foraminifera to produce ethanol, acetate, succinate (Fig. 4c). Under conditions of prolonged  
228 anaerobiosis, propionate is preferentially formed as opposed to succinate in anaerobic mitochondria,  
229 whereby one additional ATP and one CO<sub>2</sub> are formed from D-methylmalonyl-CoA via propionyl-CoA  
230 carboxylase (41, 42). We detected expression of a Foraminifera ORF with similarity to propionyl-CoA  
231 carboxylase at 28 cmbsf (data not shown) indicating that prolonged anoxic conditions stimulate production  
232 of propionate in Foraminifera mitochondria.

233 A key intermediate in the anaerobic energy metabolism of most eukaryotes is malate (41,  
234 42). During anaerobic respiration in many eukaryotes malate is converted to fumarate via the enzyme  
235 fumarase running in reverse, and the resulting fumarate then can be used as the terminal electron acceptor  
236 (41, 42). This fumarate reduction is coupled to an anaerobic electron transport chain in which electrons are  
237 transferred from NADH to fumarate via a specialized complex I and a mitochondrial membrane associated  
238 fumarate reductase (41, 42). This physiology is typical of anaerobic mitochondria, that exist in the

239 Foraminifera species *Valvulineria* and *Gromia*, and are widely distributed amongst eukaryotes including  
240 Bivalvia, Polychaeta, Platyhelminthes, Nematoda, Euglenida, and Ciliophora (41).

241 The metatranscriptomes furthermore indicated that under anoxic conditions, Foraminifera utilize  
242 creatine kinase and phosphocreatine to maintain cellular energy homeostasis (Fig. 4c). In eukaryotic cells,  
243 creatine kinase acts as a mechanism for maintaining balance between ATP consuming and producing  
244 processes (43). Our data indicate that this also occurs in anaerobic Foraminifera. In human cells, creatine  
245 kinase acts as an ATP regenerator, and the phosphocreatine pool is used as a temporal energy buffer to  
246 maintain ATP/ADP ratios inside the cell (43). By acting as an energy shuttle between ATP providing and  
247 consuming processes, phosphocreatine might help facilitate more energetically costly cellular activities  
248 under anoxic conditions for the Foraminifera, such as phagocytosis, by maintaining the spatial “energy  
249 circuit” (44). For example, creatine kinase contributes to the build-up of a large intracellular pool of  
250 phosphocreatine that represents an efficient temporal energy buffer and prevents a rapid fall in global ATP  
251 concentrations (43). This likely helps to couple the energy producing and energy consuming processes  
252 inside of Foraminifera cells during anaerobic metabolism.

253 Biogeochemical studies indicate that foraminiferans are capable of performing denitrification, that  
254 is, the conversion of  $\text{NO}_3^-$  to  $\text{N}_2$  (9). The enzymes behind the foraminiferal denitrification pathway in the  
255 genus *Globobulimina* appear to be acquired relatively early in Foraminifera evolution (10), and it was  
256 indicated that the foraminifera themselves, not associated prokaryotes, are performing the denitrification  
257 reaction (45). The sequestration of nitrate by Foraminifera is highly suggestive that the protists themselves,  
258 and not associated symbionts, are performing nitrate respiration (45).

259 Consistent with this prior evidence, we found the genes of the denitrification pathway in  
260 Foraminifera to be expressed (Fig. 4). One of these genes was shown to be a putative assimilatory nitrate  
261 reductase (Nr), but it may however function as a sulfite oxidase or dissimilatory nitrate reductase  
262 (10). Evidence for the potential dissimilatory nitrate reduction comes from this enzyme being shown to  
263 catalyze denitrification in the fungus *Cylindrocarpon tonkinense* under specific conditions (46). As  
264 described previously, we interpret the Nr genes to be involved in dissimilatory nitrate reduction with caution  
265 and refer to them as “putative nitrate reductases” since it is possible that the Nr genes function solely for  
266 nitrate assimilation in Foraminifera (10). In any case, our data show that these Nr genes are transcribed  
267 during anaerobic metabolism in benthic Foraminifera.

268 The expression of nitrate transporters (Nrt) from Foraminifera at 28 cmbsf (Fig. 4a) seems  
269 contradictory to the geochemical conditions, since nitrate and nitrite were both below detection at this depth  
270 in the core (Fig 1). However, this can be explained by the fact that many benthic Foraminifera can store  
271 nitrate in vacuoles under anoxic conditions and use the stored nitrate and nitrite as terminal electron  
272 acceptors for anaerobic respiration (9, 45, 47). Thus, the expression of the nitrate transporter genes seen



273 here could be responsible for transporting nitrate out of the vacuole (and regulating the cytosolic  
274 concentration of nitrate), and into the mitochondrion, as has been proposed previously for denitrifying  
275 Foraminifera based on genome data (10). The expression of the NirK and Nor genes indicate that the  
276 Foraminifera were actively performing two key steps of denitrification – nitrite and nitric oxide reduction  
277 (Fig 4c). Some *Bolivina* and *Stainforthia* species lack a nitrous oxide reductase and reduce nitrate only  
278 to N<sub>2</sub>O (45, 48), and we did not detect any expression of NosZ indicating that the denitrifying *Bolivina* and  
279 *Stainforthia* species in our samples were also likely reducing nitrite to nitric oxide, that is then reduced to  
280 N<sub>2</sub>O via Nor (Fig 4c). The lack of expression of the NosZ gene raises the possibility that the denitrifying  
281 Foraminifera in Namibian sediments are a source of N<sub>2</sub>O, an important greenhouse gas (49, 50). This might  
282 be a common feature of denitrifying eukaryotes in the benthos, since denitrifying Fungi in marine sediments  
283 also do not contain a nitrous oxide reductase and are an important source of N<sub>2</sub>O (51).

284 The large increase in Foraminifera gene expression upon the onset of anoxic conditions in the  
285 incubation (Fig 5) provides experimental support for the observation of increasing Foraminifera gene  
286 expression with increasing depths and sulfidic conditions in the core (Fig 2). Thus, the transcriptional  
287 activity of many benthic Foraminifera is indeed stimulated by anoxic conditions, which is consistent with  
288 experiments that showed benthic Foraminifera can survive for at least 80 days under anoxic conditions with  
289 H<sub>2</sub>S (8, 47). The peak stimulation of Foraminifera gene expression after 18 hrs at the onset of anoxic  
290 conditions might indicate the utilization of nitrate and or nitrite by anaerobic denitrifying foraminifera, once  
291 the oxygen had been consumed to below detection values. This indicates that the *Bolivina* and *Stainforthia*  
292 species in the Namibian sediments are anaerobes that prefer anoxic conditions, as this clearly stimulated  
293 their activity compared to aerobic conditions.

294

295 **Conclusions.** The increased gene expression by Foraminifera under sulfidic conditions shows for the first  
296 time that some foraminifera apparently not only survive, but are thriving, under anoxic conditions in the  
297 seafloor. Looking at the data, it becomes evident that the anaerobic energy metabolism of these  
298 Foraminifera is sufficient to support phagocytosis, clathrin-mediated-endocytosis, and biocalcification  
299 under anoxia. The data also confirm that clades of *Stainforthia* and *Bolivina* utilize pathway for  
300 denitrification and identified four pathways of ATP generation including [1] substrate level phosphorylation  
301 and fermentation, [2] fumarate reduction, [3] dissimilatory nitrate reduction, and [4] dephosphorylation of  
302 creatine-phosphate. This all indicates that anoxic sediments are a primary habitat of some benthic  
303 Foraminifera where they are capable to perform all necessary cellular functions. This anaerobic metabolism  
304 is consistent with the evidence for the emergence of Rhizaria in the Precambrian where widespread oxygen  
305 depletion was present (52). This aided the survival of benthic Foraminifera over multiple mass extinctions

306 over the last 500 million years associated with oxygen depletion, thus enabling the utility of their preserved  
307 tests as important proxies for paleoclimate and paleoceanography.

308

### 309 **Methods:**

310

311 *Sampling:* A 30 cm long sediment core was obtained from a water depth of 125 m the Namibian continental  
312 shelf (18.0 S, 11.3 E) during *F/S Meteor Expedition M148-2 'EreBUS'* on July 10<sup>th</sup>, 2018. In brief, the  
313 core was acquired with a multi corer (diameter 10 cm), which yielded an intact sediment/water interface  
314 and the upper 30 cm of sediment. After retrieval, cores were moved immediately to a 4 °C cold room and  
315 sliced every 2 cm within 24 hours. Sections were transferred immediately into sterile, DNA/RNA free 50  
316 mL falcon tubes and then frozen immediately at -20 °C until DNA and RNA extractions. Pore water  
317 geochemistry measurements were performed acquired from the same core, methodology and data have  
318 been published elsewhere (12) and the results are reported in this publication in the Figure 1B.

319

320 *Cell counting and enumeration:* Between 1 and 4 grams of deep-frozen sediment from 9  
321 sediment depths were thawed and washed over a 63 micron mesh. The residue was immediately  
322 wet-sorted and tests of cytoplasm containing Foraminifera were separated, identified to a genus  
323 level following Altenbach and Leiter (2010) and enumerated. Representative specimens were  
324 photographed using a KEYENCE VHX-6000.

325

326 *RNA extraction:* RNA was extracted as previously described (12). In brief, RNA was extracted from 0.5  
327 g of sediment using the FastRNA Pro Soil-Direct Kit (MP Biomedicals) following the manufacturer's  
328 instructions with final elution of templates in 40 µL PCR water (Roche) as described previously (12) with  
329 some modifications to maximize RNA yield and reduce DNA contamination. The first modification was  
330 that, after the supernatant was removed after first homogenization step, a second homogenization was  
331 performed with an additional 500 µL RNA Lysing Buffer. The tubes were centrifuged once again for 5  
332 minutes at maximum speed, and the supernatant from the second homogenization was combined with that  
333 resulting from the first homogenization, continuing with the protocol from the manufacturer. Second, we  
334 added glycogen at a concentration of 1 µg/mL during the 30-minute isopropanol precipitation in order to  
335 maximize recovery of the RNA pellet. To reduce DNA contamination, we extracted all RNA samples in a  
336 HEPA-filtered laminar flow hood dedicated only for RNA work (no DNA allowed inside) that also  
337 contains dedicated RNA pipettors used exclusively inside the hood with RNA samples. All surfaces were

338 treated with RNase-Zap prior to extractions and exposed to UV light for 30 minutes before and after each  
339 extraction.

340

341 *Metatranscriptomics*: Metatranscriptomes were prepared as previously described (12). In brief,  
342 DNase treatment, synthesis of complementary DNA and library construction were obtained from 10  $\mu$ L of  
343 RNA templates by processing the Trio RNA-Seq kit protocol (NuGEN Technologies). Libraries were  
344 quantified on an Agilent 2100 Bioanalyzer System, using the High Sensitivity DNA reagents and DNA  
345 chips (Agilent Genomics). The libraries constructed using specific (different) barcodes, pooled at 1 nM,  
346 and sequenced in two separate sequencing runs with a paired-end 300 mid output kit on the Illumina  
347 MiniSeq. A total of 40 million sequences were obtained after Illumina sequencing, which could be  
348 assembled *de novo* into 41,230 contigs. Quality control, *de novo* assembly, and ORFs searches were  
349 performed as described previously (12), with the additional step of using the eukaryotic code for translations  
350 and ORF predictions.

351

352 *Gene identification*: A total of 8,556 ORFs were found that were then searched for similarity using  
353 BLASTp against a database (12) containing predicted proteins from all protist, fungal, bacterial, and  
354 archaeal genomes and MAGs in the JGI and NCBI databases using DIAMOND (53). This database also  
355 contained all ORFs from the >700 transcriptomes of microbial eukaryotes from the MMETS project (14)  
356 and the recently published foraminiferal genome and transcriptome containing the novel denitrification  
357 pathway (10). Cutoff for assigning hits to specific taxa were a minimum bit score of 50, minimum amino  
358 acid similarity of 30, and an alignment length of 50 residues. Extraction blanks were also sequenced  
359 alongside the environmental samples to identify contamination, and ORFs from contaminant taxa. We  
360 assigned ORFs as being derived from Foraminifera if they had a significant similarity above this threshold  
361 to a predicted protein from a previously sequenced Foraminifera transcriptome or genome. Because our  
362 database contains predicted proteins from >700 transcriptomes of other microbial eukaryotes, we are  
363 confident that this level of stringency is sufficient to make a broad level of taxonomic assignment of ORFs  
364 from the metatranscriptomes to Foraminifera in general (as opposed to being actually derived from other  
365 protist groups).

366 ORFs assigned as Foraminifera were then additionally annotated against the Cluster of Eukaryotic  
367 Orthologous Genes (KOG) database (15), using DIAMOND with the same parameters as above. The lack  
368 of metatranscriptomic ORFs having highest similarity to *Bolivina* and *Stainforthia* (Fig S1) is easily  
369 explained by the lack of transcriptome data from the species in public databases. Nevertheless, because we  
370 cannot be sure from which species each of our metatranscriptome ORF derives, we annotated all of the

371 ORFs having highest similarity to a previously sequenced Foraminifera transcriptome or genome, as being  
372 derived from Foraminifera.

373 Contamination in the metatranscriptomes were primarily diatoms (“lab weeds”), cyanobacteria,  
374 *Streptococcus*, *Acinetobacter*, *Staphylococcus*, *Rhizobium*, *Ralstonia*, and *Burkholderia*. All ORFs that  
375 were shared between contaminant samples and the metatranscriptomes were removed prior to  
376 analysis. Incorporation of protist transcriptomes<sup>9</sup> greatly reduced the amount of laboratory contamination  
377 from eukaryotic algae such as diatoms (“lab weeds”) introduced during the library prep. All  
378 metatranscriptomes had <10% ORFs from contaminating taxa.

379  
380 *Incubation experiment:* Immediately after core retrieval and freezing of the core top samples, 2 g aliquots  
381 of sediment from the core top was added to four 20 mL sterile glass vials (for  $t_1$ ,  $t_2$ ,  $t_3$ ,  $t_4$  timepoints)  
382 containing sterile oxygen sensor spots (PreSens Precision Sensing). Oxygen was measured non-invasively  
383 using the Fibox (PreSens Precision Sensing) as described previously (54). The sediment was overlaid with  
384 ca. 18 mL of the natural hypoxic bottom water collected in the multicore leaving no air in the headspace,  
385 and crimp sealed with grey rubber butyl stoppers. The flasks were incubated on the side and oxygen sensor  
386 spots were positioned at the top (to measure oxygen in the overlying seawater) and bottom (to measure  
387 oxygen at the base of the sediment) of the flask (see Fig 5 for a photo of the setup). The flasks were  
388 incubated in the dark at 10 °C and taped to the surface of the bench to prevent rolling and mixing of the  
389 tube. Each of the four flasks for the timepoints were frozen separately at the respective timepoints  $t_1$  (18  
390 hrs),  $t_2$  (3 days),  $t_3$  (7 days), and  $t_4$  (10 days) immediately at -20 °C. Because the incubation was set up  
391 immediately after core retrieval and freezing the core top samples, the frozen core top samples served as  
392 the  $t_0$  samples for the start of the incubation. RNA extractions, metatranscriptomes, and bioinformatic  
393 processing was performed as described above.

394  
395 *Phylogenetics:* To identify the likely active foraminifera taxa in the sediments, we searched for  
396 foraminiferan 18S rDNA OTUs present within the metatranscriptomes. We performed BLASTn searches  
397 (Discontiguous Megablast, e-value 1E-10). As query we used a small custom made database of complete  
398 foraminifera sequences based on Pawlowski *et al.* (55) and Holzmann and Pawlowski (56). The resulting  
399 OTUs were reciprocally blasted against NCBI’s nr database (Discontiguous Megablast, e-value 1E-10).  
400 The two OTUs with highest similarity to Foraminifera 18S rDNA were further used for sequence  
401 extensions using a greedy approach. For this, 10bp on both ends were trimmed from the putative  
402 foraminiferan 18S rRNA OTUs to remove possible erroneous bases due to dropping read quality towards  
403 the ends of reads. We only extended the OTU fragment matching the last 1000bp of the foraminiferan  
404 18S rRNA sequences since this is a commonly used foraminifera barcoding region and allows the

405 comparison with a wide diversity of previously barcoded foraminiferan taxa (57). We performed 20  
406 iterations of greedy extension in GENEIOUS Prime 2019 (58) by mapping trimmed metatranscriptomics  
407 reads (trimmed with TRIMMOMATIC v.0.38 (Bolger, 2014 #5074) and default options) to the end-  
408 trimmed 18S rDNA OTUs. This extended 5' and 3' ends of the 18S rRNA OTUs. Both sequences were  
409 manually error corrected based on the mapped reads. We carefully and manually proved that read pairs  
410 spanned regions of high sequence similarity with other foraminiferans, i.e. highly conserved stem regions  
411 of the 18S rRNA. This approach allowed us to unambiguously extend both OTUs to yield the full 18S  
412 rRNA barcoding region. These sequences were blasted against the NCBI nr database and showed strong  
413 sequence similarity to the benthic foraminifera genera *Stainforthia* and *Bolivina*. In order to confirm their  
414 taxonomic affiliation and to refine their placement, we established two separate alignments that included  
415 30 sequences of the genus *Bolivina* (59) on the one hand, and on the other hand 30 sequences of sister  
416 genus *Stainforthia* (56). The two separate sequence sets were automatically aligned with MAFFT v.7 (60)  
417 and a phylogenetic inference was calculated with 1000 non-parametric bootstrapping pseudo replicates  
418 based on a BioNJ starting tree using PhyML (61). The best substitution models were automatically  
419 selected using the Smart Model Selection (62) under Akaike Information Criterion and the model  
420 GTR+I+G was selected for the *Bolivina* alignment and the model TN93+G+I was selected for the  
421 *Stainforthia* alignment. Both trees were visualized using ITOL and are provided in Figure 3.

422  
423 **Acknowledgements:** We dedicate this work to the late Prof. Dr. Alexander V. Altenbach, whose legacy  
424 of research into anaerobic Foraminifera was a source of inspiration for completing this study. This work  
425 was supported by the Deutsche Forschungsgemeinschaft (DFG) through Project OR 417/4-1 (W.D.O),  
426 and the *F/S* Meteor Expedition M148/2 'EreBUS'. The authors thank the captain and crew of the *F/S*  
427 Meteor assistance during the oceanographic expedition, as well as T. Ferdelman, S. Littmann, T.  
428 Wilkop, G. Klockgether and K. Imhoff who assisted in obtaining samples. This work was performed in  
429 part through the Masters in Geobiology and Paleontology Program (MGAP) at LMU Munich. G.W.  
430 acknowledges funding through the LMU Munich's Institutional Strategy LMUexcellent within the  
431 framework of the German Excellence Initiative and the European Union's Horizon 2020 Marie  
432 Skłodowska-Curie Innovative Training Network IGNITE (No. 764840). RM and MK acknowledge  
433 funding by the Deutsche Forschungsgemeinschaft (DFG, German Research Foundation) through  
434 Germany's Excellence Strategy (EXC-2077, grant no 390741603).

435  
436 **Author contributions.** W.D.O, conceived the idea for the study and wrote the paper. R.M., A.V., and T.  
437 G. F. produced data. W.D.O., R.M., A.V., M.E., G.W., and T. G. F. analyzed data. All authors participated  
438 in editing the manuscript and interpreting the results.

439  
440 **Competing interests.** The authors declare no competing financial interests.  
441  
442 **Additional information.** Supplementary Information includes supplemental figures Fig S1 and S2 and  
443 Table S1. All sequence data is publicly accessible in NCBI through BioProject number PRJNA525353.  
444  
445 **Correspondence and requests for materials** should be addressed to W.D.O.

## 447 Figures

448  
449 **Figure 1. Census count of cytoplasm-containing foraminifera tests and corresponding geochemical profiles in anoxic**  
450 **Namibian sediment.** (A) Density of the foraminifera species in the nine intervals processed compared against (B) the changing  
451 redox profile of in sediment pore water, note the accumulation of hydrogen sulphide with depth below 6 cm. (C) Representative  
452 specimens of the species enumerated, brownish-green color indicates the presence of cytoplasm. Scale bar 100  $\mu\text{m}$ .

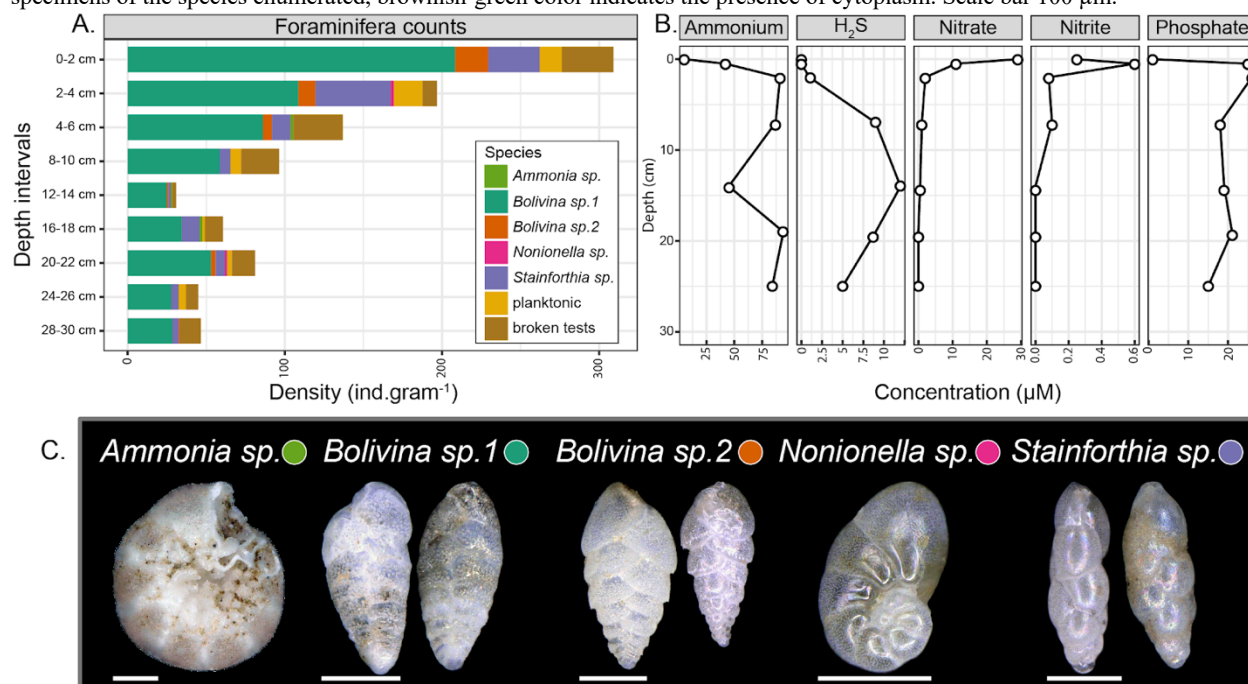

453

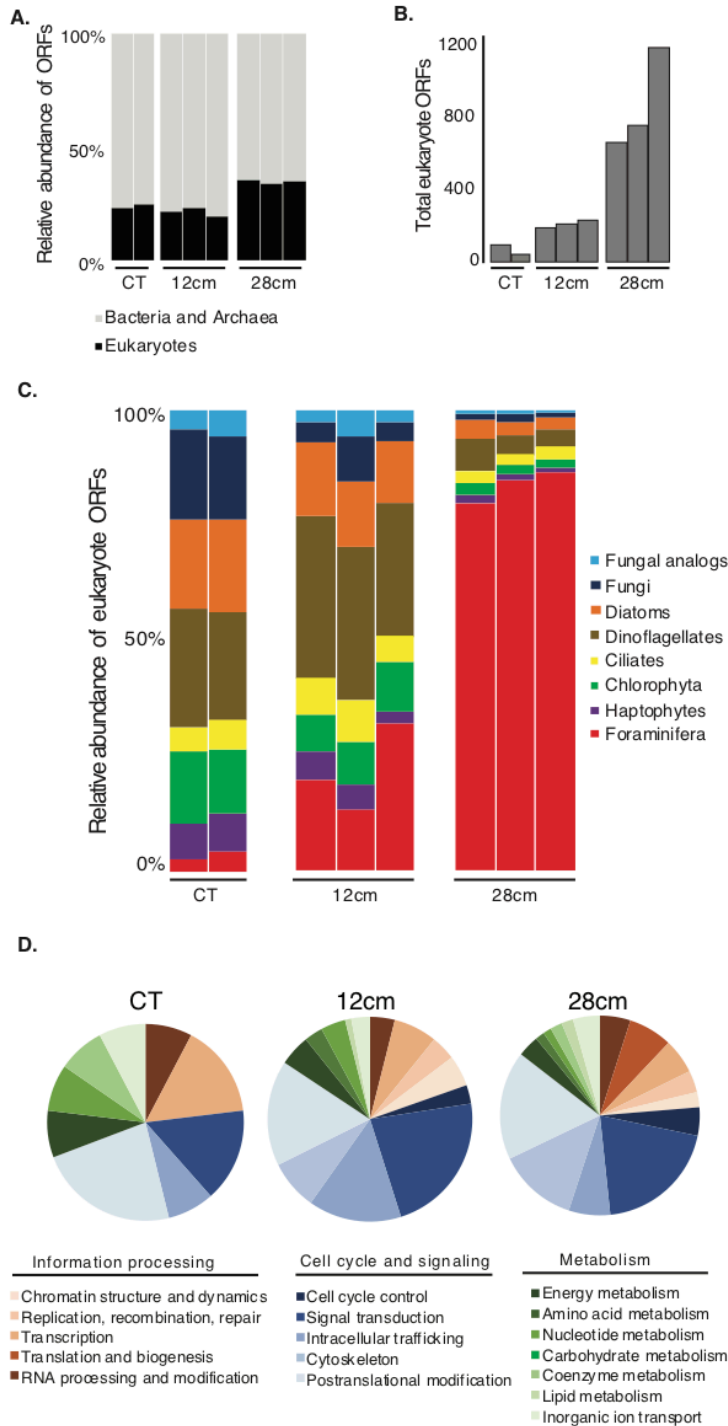

454  
 455 **Figure 2. Foraminifera exhibit high levels of gene expression under anoxia.** (A) The relative abundance of total expressed  
 456 ORFs per sample that were assigned to prokaryotes (Bacteria and Archaea) and eukaryotes (including Foraminifera). Multiple  
 457 histograms per depth represent biological replicates. (B) The total number of ORFs that were assigned to eukaryotes per sample.  
 458 Multiple histograms per depth represent biological replicates. (C) The relative abundance of expressed ORFs from different  
 459 protist Phyla (from panel B), note the dominance of Foraminifera gene expression in the deepest, most anoxic sample at 28 cm.  
 460 (D) The relative abundance of functional eukaryotic gene (KOG) families in the three sediment zones that were assigned to  
 461 expressed Foraminifera ORFs. Pie charts represent average values from the biological replicates shown in panels A-C. CT: core  
 462 top sample.

463  
464  
465  
466  
467  
468  
469  
470  
471

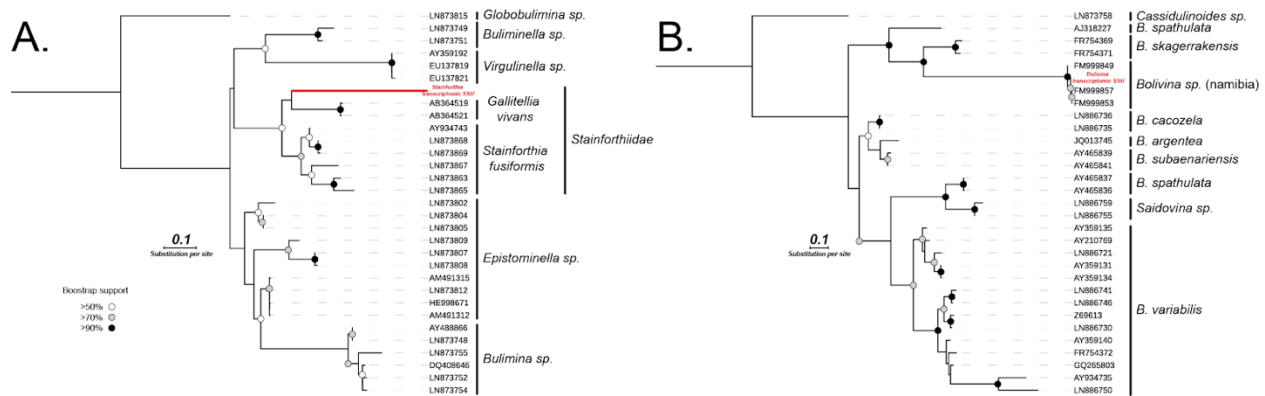

472  
473

474 **Figure 3. Phylogenetic analysis of Foraminifera affiliated 18S rDNA sequences recovered from the metatranscriptome,**  
475 **that are affiliated to the (A) Stainforthiidae family and (B) *Bolivina* genus.** The sequence affiliated to the Stainforthiidae  
476 family clearly cluster with the only two representative genus of the family, *Stainforthia* and *Gallitellia* but the position of the  
477 metatranscriptomic 18S rDNA sequence is not clearly resolved, but intact test of *Stainforthia* were observed in the sample (See  
478 Fig. 1). The metatranscriptomic 18S rDNA sequence related to *Bolivina* is nearly identical to reference sequences deposited on  
479 NCBI and that were generated from *Bolivina* specimens collected in Namibia in previous studies. Furthermore, *Bolivina*  
480 specimens dominated the morphological assemblages within the core (Fig. 1). The *Bolivina* and *Stainforthia* 18S rDNA contigs  
481 were generated by semi-automated greedy extension of 18S rDNA OTUs with trimmed metatranscriptomic paired-end reads (See  
482 methods).

483  
484  
485  
486  
487  
488  
489  
490  
491  
492  
493  
494  
495  
496  
497  
498





501 (UPGMA) of the samples based on the RNAseq data. One metatranscriptome from the core top and one from the 12 cm sample  
502 did not have any detectable expression of the ORFs of interest and are thus not shown. (B) Reconstruction of anaerobic cellular  
503 activities in Foraminifera including biomineralization, phagocytosis, CME, and transport of ingested cargo (e.g., prey cells) based  
504 on the gene expression data shown in panel A. (C) Reconstruction of potential anaerobic energy production pathways in  
505 Foraminifera based on the gene expression data shown in panel A. Red colors show genes that were expressed, red arrows show  
506 reactions that are predicted to occur based on the expression of the corresponding gene. Where expressed, gene abbreviations  
507 (e.g., Nrt) are shown in red boxes, that correspond to the same labels in panel A. Gene abbreviations that are not highlighted in  
508 red are present in the genome of the benthic foraminifera species *Globobulimina turgida* and *G. auriculata*<sup>11</sup>, but their  
509 expression was not detected. These include FH: fumarase, KGDH: alpha-ketoglutarate dehydrogenase, PK: pyruvate kinase, and  
510 ASCT: acetate:succinate CoA-transferase. The nitric oxide reductase (Nor) gene is not encoded in the benthic Foraminifera  
511 genome, but its true absence is uncertain<sup>11</sup>. This updated representation of Foraminifera anaerobic energy production is  
512 modified from anaerobic energy metabolism pathways in eukaryotes that were previously reviewed<sup>39,40</sup>.

513

514

515

516

517

518

519

520

521

522

523

524

525

526

527

528

529

530

531

532

533

534

535

536

537

538

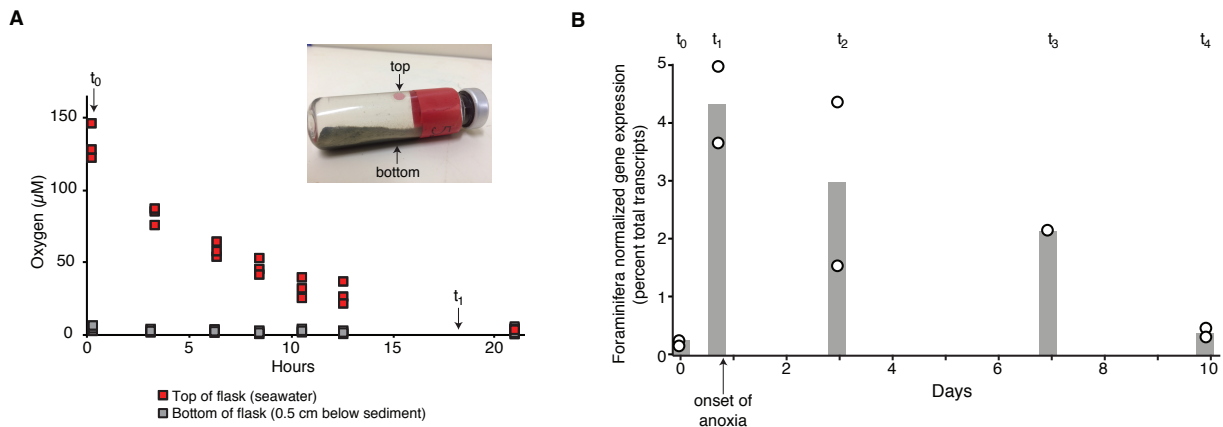

539 **Figure 5. Oxygen consumption and Foraminifera gene expression in a 10-day incubation.** (A) Oxygen consumption at the  
540 top (in seawater) and bottom (underneath the sediment) of the incubated sediments, the photo shows the experimental setup and  
541 the positioning of the two oxygen sensor spots where measurements were made. After the onset of anoxia after 20 hours, the top  
542 and bottom of the flask remained anoxic for the duration of the incubation. The flask was incubated in the dark at 10 °C. The  
543 individual data points represent O<sub>2</sub> measurements made on the four separate flasks incubated for the t<sub>1</sub>, t<sub>2</sub>, t<sub>3</sub>, t<sub>4</sub> timepoints. The  
544 21 hr point includes only the t<sub>2</sub>, t<sub>3</sub>, t<sub>4</sub> flasks since t<sub>1</sub> was already taken at 18 hrs. (B) The relative abundance of Foraminifera  
545 transcripts (percent of total transcripts) at t<sub>0</sub> and the four timepoints, individual points represent replicates and histograms  
546 represent the average values. Note the sharp increase in gene expression that coincides with the onset of anoxia after 20 hrs.

547

548

549

550

551

552

553

554

555

556

557

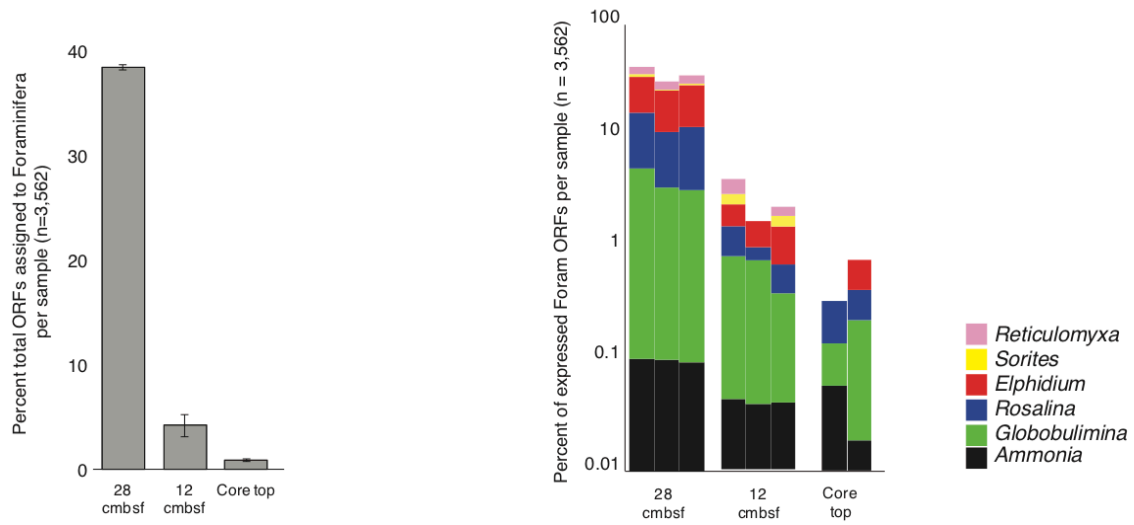

558

559

560

**Figure S1: Relative distributions of taxa that Foraminifera-derived ORFs in the metatranscriptome had as top hits after searches with DIAMOND.**

561

562

563

564

565

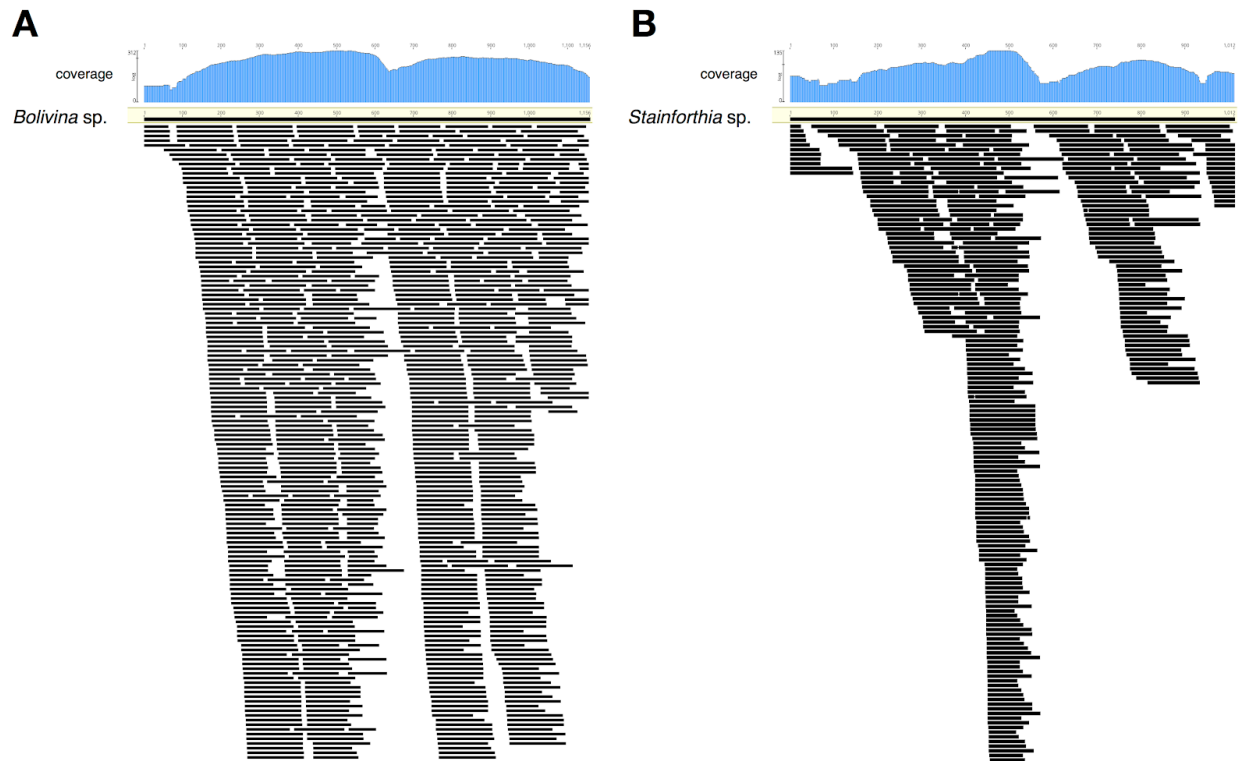

566  
567 **Figure S2. Schematic representation of trimmed metatranscriptomic reads mapped to the**  
568 **previously sequenced 18S rRNA genes *Bolivina sp.* (A) and *Stainforthia sp.* (B).** The coverage of each  
569 fragment is indicated with blue histograms on the top. Each read is shown as black bar. Mapping was  
570 performed with GENEIOUS prime as indicated in the methods section. Note that more reads map to  
571 *Bolivina*, which is consistent with the dominance of cytoplasm bearing tests from *Bolivina* throughout the  
572 core (Fig 1).

573

574

575

576

577

578

579

580

581

582

583 **Table S1. Sequencing and assembly statistics.**

| Sample                | Replicate | Reads (millions) | # contigs | # reads mapped (millions) | ORFs  |
|-----------------------|-----------|------------------|-----------|---------------------------|-------|
| core top (frozen, t0) | a         | 4.7              | 2,602     | 3.7                       | 695   |
|                       | b         | 11.1             | 2,927     | 9.2                       | 687   |
| 12 cmbsf (frozen)     | a         | 3.9              | 4,362     | 2.7                       | 539   |
|                       | b         | 2.2              | 2,726     | 1.3                       | 1,075 |
|                       | c         | 3.5              | 5,888     | 2.1                       | 1,113 |
| 28 cmbsf (frozen)     | a         | 3.9              | 7,429     | 2.4                       | 995   |
|                       | b         | 5.8              | 9,636     | 4.2                       | 1,993 |
|                       | c         | 4.1              | 5,660     | 2.9                       | 1,459 |
| incubation 18 hours   | a         | 2                | 3,854     | 0.83                      | 996   |
|                       | b         | 2                | 3,811     | 0.73                      | 947   |
| incubation 3 days     | a         | 3                | 7,167     | 1.2                       | 1636  |
|                       | b         | 3                | 3,860     | 1.3                       | 913   |
| incubation 7 days     | a         | 3                | 4,222     | 1.3                       | 904   |
| incubation 10 days    | a         | 3                | 2,463     | 1.0                       | 553   |
|                       | b         | 2                | 2,279     | 1.2                       | 543   |

584

585

586

587

588 **References**

589

- 590 1. A. V. Altenbach, in *Encyclopedia of Geobiology*, J. Reitner, V. Thiel, Eds. (Springer,  
591 Netherlands, 2012), pp. 393-396.
- 592 2. F. Wiese, J. Reitner, in *Encyclopedia of Geobiology*, J. Reitner, V. Thiel, Eds. (Springer,  
593 Dordrecht, Netherlands, 2012), pp. 293-306.
- 594 3. J. W. Murray, *Ecology and applications of benthic foraminifera*. (Cambridge University  
595 Press, 2006).
- 596 4. A. J. Gooday, L. A. Levin, P. Linke, T. Heeger, in *Deep-Sea Food Chains and the Global  
597 Carbon Cycle*, G. T. Rowe, V. Pariente, Eds. (Springer, Netherlands, 1992), pp. 63–91.
- 598 5. A. J. Gooday, H. Nomaki, H. Kitazato, Modern deep-sea benthic foraminifera: a brief  
599 review of their morphology-based biodiversity and trophic diversity. *Geol Soc Lond Spec  
600 Publ* **303**, 97–119 (2008).
- 601 6. A. J. Gooday, J. M. Bernhard, L. A. Levin, S. B. Suhr, Foraminifera in the Arabian Sea  
602 oxygen minimum zone and other oxygen-deficient settings: taxonomic composition,

- 603 diversity, and relation to metazoan faunas. *Deep Sea Res Part II Top Stud Oceanogr* **47**,  
604 25–54 (2000).
- 605 7. L. A. Levin *et al.*, Effects of natural and human-induced hypoxia on coastal benthods.  
606 *Biogeosciences* **6**, 2063-2098 (2009).
- 607 8. L. Moodley, G. J. Van der Zwaan, P. M. J. Herman, L. Kempers, P. Van Breugel,  
608 Differential response of benthic meiofauna to anoxia with special reference to  
609 Foraminifera (Protista: Sarcodina). *Marine Ecology Progress Series* **158**, 151-163 (1997).
- 610 9. N. Risgaard-Petersen *et al.*, Evidence for complete denitrification in a benthic  
611 foraminifer. *Nature* **443**, 93-96 (2006).
- 612 10. C. Woehle *et al.*, A Novel Eukaryotic Denitrification Pathway in Foraminifera. *Curr Biol*  
613 **28**, 2536-2543 e2535 (2018).
- 614 11. J. M. Bernhard, E. Alve, Survival, ATP pool, and ultrastructural characterization of  
615 benthic foraminifera from Drammensfjord (Norway): response to anoxia. *Marine*  
616 *Micropaleontology* **28**, 5-17 (1996).
- 617 12. W. D. Orsi *et al.*, Metabolic activity analyses demonstrate that Lokiarchaeon exhibits  
618 homoacetogenesis in sulfidic marine sediments. *Nat Microbiol*, (2020).
- 619 13. L. Pillet, J. Pawlowski, Transcriptome analysis of foraminiferan *Elphidium margaritaceum*  
620 questions the role of gene transfer in kleptoplastidy. *Mol Biol Evol* **30**, 66-69 (2013).
- 621 14. P. J. Keeling *et al.*, The Marine Microbial Eukaryote Transcriptome Sequencing Project  
622 (MMETSP): illuminating the functional diversity of eukaryotic life in the oceans through  
623 transcriptome sequencing. *PLoS Biol* **12**, e1001889 (2014).
- 624 15. R. L. Tatusov, E. V. Koonin, D. J. Lipman, A genomic perspective on protein families.  
625 *Science* **278**, 631-637 (1997).
- 626 16. I. Monirith *et al.*, Asia-Pacific mussel watch: monitoring contamination of persistent  
627 organochlorine compounds in coastal waters of Asian countries. *Mar Pollut Bull* **46**, 281-  
628 300 (2003).
- 629 17. W. G. Zumft, Cell biology and molecular basis of denitrification. *Microbiol Mol Biol Rev*  
630 **61**, 533-616 (1997).
- 631 18. J. Tyszka *et al.*, Form and function of F-actin during biomineralization revealed from live  
632 experiments on foraminifera. *Proc Natl Acad Sci U S A*, (2019).
- 633 19. S. Stritt *et al.*, A gain-of-function variant in *DIAPH1* causes dominant  
634 macrothrombocytopenia and hearing loss. *Blood* **127**, 2903-2914 (2016).
- 635 20. M. P. Nardelli *et al.*, Experimental evidence for foraminiferal calcification under anoxia.  
636 *Biogeosciences* **11**, 4029-4038 (2014).
- 637 21. G. J. Doherty, H. T. McMahon, Mechanisms of endocytosis. *Annu Rev Biochem* **78**, 857-  
638 902 (2009).
- 639 22. G. Chimini, P. Chavrier, Function of Rho family proteins in actin dynamics during  
640 phagocytosis and engulfment. *Nat Cell Biol* **2**, E191-196 (2000).
- 641 23. W. F. Martin, A. G. M. Tielens, M. Mentel, S. G. Garg, S. V. Gould, The physiology of  
642 phagocytosis in the context of mitochondrial origin. *Microbiol Mol Biol Rev* **81**, e00008-  
643 00017 (2017).
- 644 24. O. I. Stendahl, J. H. Hartwig, E. A. Brotschi, T. P. Stossel, Distribution of actin-binding  
645 protein and myosin in macrophages during spreading and phagocytosis. *J Cell Biol* **84**,  
646 215-224 (1980).

- 647 25. R. K. Tsai, D. E. Discher, Inhibition of "self" engulfment through deactivation of myosin-II  
648 at the phagocytic synapse between human cells. *J Cell Biol* **180**, 989-1003 (2008).
- 649 26. M. Vicente-Manzanares, X. Ma, R. S. Adelstein, A. R. Horwitz, Non-muscle myosin II  
650 takes centre stage in cell adhesion and migration. *Nat Rev Mol Cell Biol* **10**, 778-790  
651 (2009).
- 652 27. C. Leiter, A. V. Altenbach, Benthic Foraminifera from the diatomaceous mud belt off  
653 Namibia: characteristic species for severe anoxia. *Palaeontologia Electronica* **13.2.11A**,  
654 (2010).
- 655 28. H. D. Schulz *et al.*, Dense populations of a giant sulfur bacterium in Namibian shelf  
656 sediments. *Science* **284**, 493-495 (1999).
- 657 29. C. LeKieffre *et al.*, Surviving anoxia in marine sediments: The metabolic response of  
658 ubiquitous benthic foraminifera (*Ammonia tepida*). *PLoS One* **12**, e0177604 (2017).
- 659 30. K. A. Koho, E. Pina-Ochoa, in *Anoxia: Evidence for Eukaryote Survival and Paleontological*  
660 *Strategies*, A. V. Altenbach, J. M. Bernhard, J. Seckbach, Eds. (Springer, Dordrecht, 2012),  
661 chap. 4, pp. 251-285.
- 662 31. F. J. Jorissen, H. C. De Stigter, J. G. V. Widmark, A conceptual model explaining benthic  
663 foraminiferal habitats. *Marine Micropaleontology* **26**, 3-15 (1995).
- 664 32. W. D. Orsi, Ecology and evolution of seafloor and subseafloor microbial communities.  
665 *Nat Rev Microbiol* **16**, 671-683 (2018).
- 666 33. B. Jørgensen, Mineralization of organic matter in the sea bed – the role of sulfate  
667 reduction. *Nature* **296**, 643-645 (1982).
- 668 34. G. Lavik *et al.*, Detoxification of sulphidic African shelf waters by blooming  
669 chemolithotrophs. *Nature* **457**, 581-584 (2009).
- 670 35. M. M. Kuypers *et al.*, Massive nitrogen loss from the Benguela upwelling system through  
671 anaerobic ammonium oxidation. *Proc Natl Acad Sci U S A* **102**, 6478-6483 (2005).
- 672 36. D. A. Caron *et al.*, Probing the evolution, ecology and physiology of marine protists using  
673 transcriptomics. *Nat Rev Microbiol* **15**, 6-20 (2017).
- 674 37. P. Rougerie, V. Miskolci, D. Cox, Generation of membrane structures during  
675 phagocytosis and chemotaxis of macrophages: role and regulation of the actin  
676 cytoskeleton. *Immunol Rev* **256**, 222-239 (2013).
- 677 38. J. W. Lengeler, G. Drews, H. G. Schegel, *Biology of the Prokaryotes*. (Blackwell Science,  
678 1999).
- 679 39. F. C. Neidhardt, J. L. Ingraham, M. Schaecter, *Physiology of the Bacterial Cell*. (Sinauer  
680 Associates, 1990).
- 681 40. A. H. Stouthamer, A theoretical study on the amount of ATP required for synthesis of  
682 microbial cell material. *Antonie van Leeuwenhoek* **39**, 545-565 (1973).
- 683 41. M. Muller *et al.*, Biochemistry and evolution of anaerobic energy metabolism in  
684 eukaryotes. *Microbiol Mol Biol Rev* **76**, 444-495 (2012).
- 685 42. V. Zimorski, M. Mentel, A. G. M. Tielens, W. F. Martin, Energy metabolism in anaerobic  
686 eukaryotes and Earth's late oxygenation. *Free Radic Biol Med*, (2019).
- 687 43. U. Schlattner, M. Tokarska-Schlattner, T. Wallimann, Mitochondrial creatine kinase in  
688 human health and disease. *Biochim Biophys Acta* **1762**, 164-180 (2006).
- 689 44. T. Wallimann, M. Wyss, D. Brdiczka, K. Nicolay, H. M. Eppenberger, Intracellular  
690 compartmentation, structure and function of creatine kinase isoenzymes in tissues with



- 691 high and fluctuating energy demands: the 'phosphocreatine circuit' for cellular energy  
692 homeostasis. *Biochem J* **281** ( Pt 1), 21-40 (1992).
- 693 45. E. Pina-Ochoa *et al.*, Widespread occurrence of nitrate storage and denitrification  
694 among Foraminifera and Gromiida. *Proc Natl Acad Sci U S A* **107**, 1148-1153 (2010).
- 695 46. T. O. Watsuji, N. Takaya, A. Nakamura, H. Shoun, Denitrification of nitrate by the fungus  
696 *Cylindrocarpum tonkinense*. *Biosci. Biotechnol. Biochem.* **67**, 1115-1120 (2003).
- 697 47. E. Pina-Ochoa, K. A. Koho, E. Geslin, N. Risgaard-Petersen, Survival and life strategy of  
698 foraminifer, *Globobulimina turgida*, through nitrate storage and denitrification:  
699 laboratory experiments. *Marine Ecology Progress Series* **417**, 39-49 (2010).
- 700 48. A. Kamp, S. Hogslund, N. Risgaard-Petersen, P. Stief, Nitrate Storage and Dissimilatory  
701 Nitrate Reduction by Eukaryotic Microbes. *Front Microbiol* **6**, 1492 (2015).
- 702 49. S. W. A. Naqvi *et al.*, Marine hypoxia/anoxia as a source of CH<sub>4</sub> and N<sub>2</sub>O. *Biogeosciences*  
703 **7**, 2159-2190 (2010).
- 704 50. R. N. van den Heuvel, M. M. Hefting, N. C. Tan, M. S. Jetten, J. T. Verhoeven, N<sub>2</sub>O  
705 emission hotspots at different spatial scales and governing factors for small scale  
706 hotspots. *Sci Total Environ* **407**, 2325-2332 (2009).
- 707 51. S. D. Wankel *et al.*, Evidence for fungal and chemodenitrification based N<sub>2</sub>O flux from  
708 nitrogen impacted coastal sediments. *Nature Communications* **8**, 15595 (2017).
- 709 52. B. J. Nettersheim *et al.*, Putative sponge biomarkers in unicellular Rhizaria question an  
710 early rise of animals. *Nat Ecol Evol* **3**, 577-581 (2019).
- 711 53. B. Buchfink, C. Xie, D. H. Huson, Fast and sensitive protein alignment using DIAMOND.  
712 *Nat Methods* **12**, 59-60 (2015).
- 713 54. A. S. Ortega-Arbulu, M. Pichler, A. Vuillemin, W. D. Orsi, Effects of organic matter and  
714 low oxygen on the mycobenthos in a coastal lagoon. *Environ Microbiol* **21**, 374-388  
715 (2019).
- 716 55. J. Pawlowski, M. Holzmann, J. Tyszka, New supraordinal classification of Foraminifera:  
717 Molecules meet morphology. *Marine Micropaleontology* **100**, 1-10 (2013).
- 718 56. M. Holzmann, J. Pawlowski, An updated classification of rotaliid foraminifera based on  
719 ribosomal DNA phylogeny. *Marine Micropaleontology* **132**, 18-34 (2017).
- 720 57. J. Pawlowski, M. Holzmann, A plea for DNA barcoding of Foraminifera. *The Journal of*  
721 *Foraminiferal Research* **44**, 62-67 (2014).
- 722 58. M. Kearse *et al.*, Geneious Basic: an integrated and extendable desktop software  
723 platform for the organization and analysis of sequence data. *Bioinformatics* **28**, 1647-  
724 1649 (2012).
- 725 59. M. Kucera *et al.*, Caught in the act: Anatomy of an ongoing benthic-planktonic transition  
726 in a marine protist. *Journal of Plankton Research* **39**, 436-449 (2017).
- 727 60. K. Katoh, D. M. Standley, MAFFT multiple sequence alignment software version 7:  
728 improvements in performance and usability. *Mol Biol Evol* **30**, 772-780 (2013).
- 729 61. S. Guindon *et al.*, New algorithms and methods to estimate maximum-likelihood  
730 phylogenies: assessing the performance of PhyML 3.0. *Syst Biol* **59**, 307-321 (2010).
- 731 62. V. Lefort, J. E. Longueville, O. Gascuel, SMS: Smart Model Selection in PhyML. *Mol Biol*  
732 *Evol* **34**, 2422-2424 (2017).
- 733
